## CORRECTION

## Correction: A behavioural model of minority language shift: Theory and empirical evidence

The *PLOS ONE* Staff

A technical error that occurred during the production process resulted in this article's peer review history publishing incorrectly; the publisher apologizes for the error. The full Responses to Reviewers from the peer review history can be found below.

## Supporting information

**S1 File. Response to reviewers, first revision.** This file includes the authors' response to reviewers for the first round of revisions.  
(PDF)

**S2 File. Response to reviewers, second revision.** This file includes the authors' response to reviewers for the second round of revisions.  
(PDF)

## Reference

1. Uriarte JR, Sperlich S (2021) A behavioural model of minority language shift: Theory and empirical evidence. *PLoS ONE* 16(6): e0252453. <https://doi.org/10.1371/journal.pone.0252453> PMID: 34086760

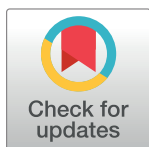

## OPEN ACCESS

**Citation:** The *PLOS ONE* Staff (2021) Correction: A behavioural model of minority language shift: Theory and empirical evidence. *PLoS ONE* 16(7): e0254625. <https://doi.org/10.1371/journal.pone.0254625>

**Published:** July 9, 2021

**Copyright:** © 2021 The PLOS ONE Staff. This is an open access article distributed under the terms of the [Creative Commons Attribution License](https://creativecommons.org/licenses/by/4.0/), which permits unrestricted use, distribution, and reproduction in any medium, provided the original author and source are credited.
